# Supplementary material for: Synthesis and excited‐state photodynamics of phenylethyne‐linked porphyrin–phthalocyanine dyads
Source: Royal Society of Chemistry journal article supplement (doi:10.1039/a906273d), 2000-01-01
Supplement: a906273d.doc [file a906273d.doc]

Supplementary Information for:

Synthesis and Excited-State Photodynamics of

Phenylethyne-Linked Porphyrin-Phthalocyanine Dyads

Sung Ik Yang,@ Junzhong Li, # Hyun Sun Cho,º Dongho Kim,º

David F. Bocian,* Dewey Holten,@,* and Jonathan S. Lindsey#,*

Department of Chemistry

North Carolina State University

Raleigh, North Carolina 27695-8204

Department of Chemistry

Washington University

St. Louis, MO 63130-4889

Department of Chemistry

University of California

Riverside, CA 92521-0403

Korea Research Institute of Standards and Science

P. O. Box 102, Yusung, Korea

**1,2-Diheptylbenzene (1).** Following the procedure of Hanack for homologous compounds,1 a solution of 1-bromoheptane (89.5 g, 0.5 mol) in anhydrous Et2O (50 mL) was added dropwise to a mixture of Mg (12.2 g, 0.502 mol) in anhydrous Et2O (200 mL). The resulting Grignard reagent was added into a stirred solution of *o*-dichlorobenzene (29.5 g, 0.21 mol) and dichloro[1,3-bis(diphenylphosphine)propane]nickel(II) (0.25 g) in Et2O (200 mL) at 0oC. After complete addition, the reaction mixture was refluxed for 12 h, then cooled to room temperature and hydrolyzed with 2 N HCl (200 mL). The organic layer was separated and the aqueous layer was extracted with Et2O (3 x 100 mL). The combined Et2O layers were washed with H2O (3 x 150 mL), dried over CaCl2, and filtered. The solvent was removed under reduced pressure and the resulting residue was distilled under vacuum to afford 34 g of a colorless oil (bp 143~145 ˚C/0.25 mmHg) in 62% yield: 1H NMR (300 MHz, CDCl3): = 0.90 (t, 6H, 2 x CH3, *J* = 6.76Hz), 1.35 (m, 16H, 8 x CH2 ), 1.57 (m, 4H, 2 x CH2 ), 2.59 (t, 4H, 2 x CH2, *J* = 7.89 Hz), 7.12 (m, 4H, ArH.); MS (70 eV) *m/z*: 274 (M+), 189 (M+ - C6H13), 175 (M+ - C7H15), 119 (M+ - C11H23), 105 (C8H9+). These data are consistent with literature values.2

**1,2-Dibromo-4,5-diheptylbenzene (2).** Following the procedure of Hanack for homologous compounds,1 bromine (33.6 g, 0.21 mol) was added over a period of 2.5 h to an ice-cooled mixture of **1** (27.4 g,0.10 mol), iron powder (0.8 g, 0.014 mol) and a catalytic amount of iodine in CH2Cl2 (20 mL). The reaction mixture was stirred for 48 h at 0oC and then 6 h at room temperature. Then the reaction mixture was poured into a 5% NaOH/NaHSO3 solution and the two layers were allowed to separate. The organic layer was washed with H2O (3 x 50 mL), dried over Na2SO4, filtered, and the solvent removed under reduced pressure. Hexane was added to the residue and the resulting solution was suction filtered over silica gel. After removal of the solvent, the brown oil obtained was further purified by recrystallization from hexane at -45oC. The desired product was obtained as a pale yellow oil in 58% yield (25.2 g): 1H NMR (300 MHz, CDCl3): = 0.89 (t, 6H, 2 x CH3, *J* = 6.60 Hz), 1.31 (m, 16H, 8 x CH2), 1.52 (m, 4H, 2 x CH2), 2.50 (t, 4H, 2 x CH2, *J* = 7.80 Hz), 7.35 (s, 2H, ArH). These data are consistent with literature values.2

**1,2-Dicyano-4,5-diheptylbenzene (3).** Following the procedure of Hanack for homologous compounds,1 a mixture of **2** (12.96 g, 30 mmol) and CuCN (8.06 g, 90 mmol) was refluxed in dry DMF (100 mL) under an argon atmosphere for 5.5 h. After cooling to room temperature, the reaction mixture was poured into concentrated NH4OH (450 mL), and the solution was stirred at room temperature for 12 h under a stream of air. The resulting blue mixture was filtered and the filtrate was extracted with Et2O ( 3 x 100 mL). The combined organic layers were washed with H2O ( 3 x 100 mL) and dried over CaCl2, filtered, and the solvent removed under reduced pressure. The residue was purified by column chromatography (silica: toluene/hexane 3:2) to give the product as a colorless oil (Rf = 0.24) in 42% yield (4.05 g): 1H NMR (300 MHz): = 0.89 (t, 4H, 2 x CH2, *J* = 6.60 Hz), 1.32 (m, 16H, 8 x CH2), 1.59 (m, 4H, 2 x CH2), 2.68 (t, 4H, 2 x CH2, *J* = 7.80 Hz), 7.56 (s, 2H, ArH); MS (70 eV) *m/z*: 324 (M+), 225(M+ - C7H15), 156 (M+ - C12H25). These data are consistent with literature values.2

**4-Aminophthalonitrile (4).** Following the general procedure of Griffiths and Roozpeikar,3 a suspension of 4-nitrophthalonitrile (3.89 g, 22.5 mmol) in a mixture of methanol (80 mL) and concentrated hydrochloric acid (17.5 mL) was heated to reflux. Iron powder (4.0 g, 71.42 mmol) was added in small portions over 1 h., and the reaction mixture continued to reflux for an additional 1 h. After cooling to room temperature, the mixture was poured into ice water, and the precipitate formed was collected by filtration, washed with water and dried under vacuum. The crude product was purified by column chromatography (silica: toluene /ethyl acetate 3:1). The desired product was obtained as a white solid in 86% yield (2.80 g): 1H NMR (300 MHz): = 4.31 (s, 2H, NH2), 6.84 (dd, 1H, *J* = 7.80, 2.10 Hz, ArH), 6.94 (d, 1H, *J* = 2.10 Hz, ArH), 7.51 (d, 1H, *J* = 8.70 Hz, ArH); MS (70 eV) *m/z*: 143(M+), 128 (M+ - NH2).

**4-Iodophthalonitrile (5).** Following Leznoff's procedure with slight modification in purification,4 a suspension of 4-aminophthalonitrile (2.86 g, 20mmol) in 2.5 M H2SO4 (40mL) was cooled to –10oC. A solution of sodium nitrite (1.6 g, 22.67 mmol) in H2O (8 mL) was added dropwise with stirring, while the temperature of the mixture was kept between –10 and 0oC. After complete addition, the resulting mixture was rapidly filtered by suction filtration. The cold filtrate was added dropwise to a solution of potassium iodide (3.6 g, 21.33 mmol) in 20 mL of H2O at 0oC. The resulting black mixture was allowed to warm to room temperature with stirring, and the black precipitate was collected by filtration. The solid was then dissolved in CH2Cl2 (50 mL), washed with cold water (2 x 50 mL), NaHCO3 solution (10%, 1 x 50 mL), cold water (1 x 50 mL), saturated Na2S2O3 (2 x 50 mL), and again with water (3 x 50 mL). The organic solution was dried over MgSO4, filtered, and concentrated to ca. 10 mL. Purification by column chromatography (silica: CH2Cl2) afford the product as a white solid (Rf = 0.67) in 70% yield (3.5 g): 1H NMR (300 MHz): = 7.53 (d, 1H, *J* = 8.70 Hz, ArH), 8.13 (m, 2H, ArH); MS (70 eV) *m/z*: 254(M+), 127(M+ - I). These data are consistent with literature values.4

**4-(3-Hydroxy-3-methyl-1-butynyl)phthalonitrile (6).** Following a procedure nearly identical to that recently published,5 bis[triphenylphosphine]palladium dichloride **(**0.035 g) and copper(I) iodide (5 mg) were added successively to 4-iodophthalonitrile (1.27 g, 0.005 mol) and 2-methylbut-3-yn-2-ol (0.5 g, 0.006 mol) in freshly distilled diethylamine (10 mL) at room temperature under argon atmosphere. After stirring at room temperature for 6 h, the reaction was complete as checked by TLC (silica gel, CH2Cl2). The solvent was evaporated, then water was added and the residue was extracted with Et2O (3 x 20 mL). The combined organic layers were washed with water (3 x 30 mL), dried over Na2SO4, and the solvent removed under reduced pressure. The resulting residue was purified by column chromatography (silica: hexane/ethyl acetate 3:2) to give the desired product as an oil (Rf = 0.48) which upon cooling became a white solid in 61% yield (0.62 g): 1H NMR (300 MHz): = 1.63 (s, 6H, 2 x CH3), 2.05 (s, 1H, OH), 7.75 (m, 2H, ArH), 7.82 (s, 1H, ArH); MS(70eV) *m/z*: 209(M+ - H), 195 (M+ - CH3). HRMS (EI) calcd for C13H10N2O 210.0793, found 210.0797. These data are consistent with literature values.5

**References**

(1) Hanack, M.; Haisch, P.; Lehmann, H.; Subramanian, L. R. *Synthesis* **1993**, 387-390.

(2) Nishi, H.; Azuma, N.; Kitahara, K. *J. Heterocyclic Chem*. **1992**, *29*, 475-477.

(3) Griffiths, J.; Roozpeikar, B. *J. Chem. Soc. Perkin Trans. 1* **1976**, 42-45.

(4) Marcuccio, S. M.; Svirskaya, P. I.; Greenberg, S.; Lever, A. B. P.; Leznoff, C. C.; Tomer, K. B. *Can. J. Chem*. **1985**, *63*, 3057-3069.

(5) Maya, E. M.; Haisch, P.; Vázquez, P.; Torres, T. *Tetrahedron* **1998**, *54*, 4397-4404.
